# Supplementary material for: Clinical Applications of Machine Learning in the Management of Intraocular Cancers: A Narrative Review
Source: PubMed Central journal article supplement — Invest Ophthalmol Vis Sci. 2023 Jul 21;64(10):29. doi: 10.1167/iovs.64.10.29 (PMC10365137; doi:10.1167/iovs.64.10.29), 2023-07-21
Supplement: iovs-64-10-29_s001.pdf [file iovs-64-10-29_s001.pdf]

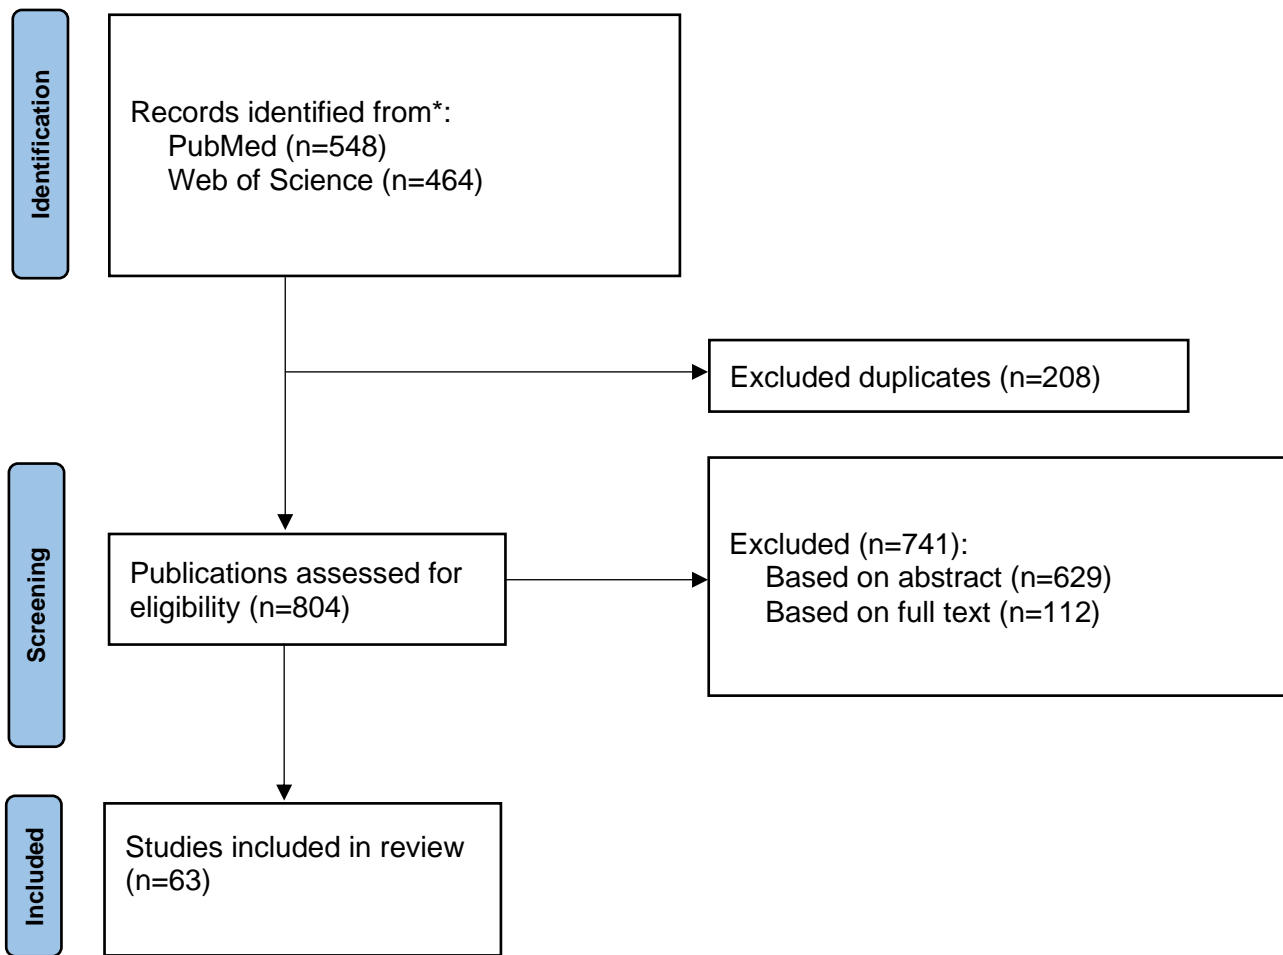

\*Search term: (uveal melanoma, choroidal melanoma, choroidal nevi, ciliary body melanoma, ciliochoroidal melanoma, iridociliary melanoma, iris melanoma, intraocular melanoma, ocular melanoma, nevus iris, nevi iris, retinal pigment epithelium adenoma, retinoblastoma, ocular oncology) **AND** (machine learning, quantification, transfer learning, artificial intelligence, neural network, deep learning, computer assisted, decision support systems, algorithm, computer vision, natural language processing)

**Supplemental Figure 1. Literature search methodology.** PubMed and Web of Science were queried with the same search terms, resulting in 804 unique publications that were evaluated. 63 publications met the inclusion criteria.
